# Supplementary material
Source: PubMed Central journal article supplement (PMC2758274)
Supplement: NIHMS148749-supplement-supplement_1.pdf [file NIHMS148749-supplement-supplement_1.pdf]

## Supplemental Figure Legends

**Supplemental Figure S1.** Expression of *Isl1* and *Isl2* during retina development. (A-D) In situ hybridization of wild type retina sections with *Isl1* and *Isl2* probes. Compared to *Isl1* expression in RGCs and amacrine cells (arrows) (A,C), *Isl2* is only expressed in selective 30% RGCs in the GCL (B,D). (E-J) Immunolabeled retinal sections at E13.5 (E-G) and E15.5 (H-J) show the overall co-expression (arrows) of ISL1 (red) and Brb3b (green) in *Isl2*-null mice with occasional BRN3B<sup>+</sup>-only cells (open arrowhead). The anti-ISL1 immunolabeling shows an identical ISL1 expression pattern in wild type (see Fig. 1) and *Isl2*-null retina. Inserts show the enlarged views of the corresponding boxed regions. NBL, neuroblast layer; GCL, ganglion cell layer. Scale bar: 100  $\mu$ m.

**Supplemental Figure S2.** *Isl1-lacZ* reporter expression recapitulates the expression pattern of endogenous *Isl1*. In situ hybridization, anti-ISL1 immunolabeling, and X-Gal staining of *Isl1*<sup>lacZ/+</sup> retina sections at E14.5 show the similar expression profile of *Isl1* mRNA (A), ISL1 protein (B), and *Isl1-lacZ* (C). Inserts show the enlarged views of the corresponding boxed regions. Scale bar: 100  $\mu$ m.

**Supplemental Figure S3.** Co-occupancy of ISL1 and BRN3B on RGC promoters in E13.5 WT retina but not in *Brn3b*-null or *Isl1*-null tissues. (A) Anti-BRN3B and anti-ISL1 antibodies co-precipitate with the promoters of *Brn3b*, *Shh*, *Brn3a* and *Isl2* in E13.5 WT retina. Both antibodies do not precipitate with these promoters in *Brn3b*-null retina. Anti-ISL1 antibody does not precipitate with these promoters in cerebellum. (B) Western blot with anti-ISL1 antibody using cerebellum and retina tissue preparation. The antibody primarily recognizes a single band of ISL1 in retina but not in cerebellum, suggesting that ISL1 is not expressed in cerebellum and that the anti-ISL1-precipitated chromatin is specifically ISL1-bound DNA.

**Supplemental Figure S4.** Sequences of RGC-specific promoters occupied by both ISL1 and BRN3B during RGC differentiation. (A) Primer sets used to PCR amplify the precipitated promoter regions. (B) Sequences of

RGC-specific promoters flanking the Brn3-binding sites (red) and their distances from the transcription initiation sites, Potential ISL1-binding regions are indicated in blue. Identified ISL1-binding consensus is underlined. (C) Summary of the Brn3-binding sites in RGC-specific genes and the derived consensus sequence.

**Supplemental Figure S5.** Progenitor proliferation in E17.5 *Isl1*-null retina. *Isl1* -null retina displays a slight 17% decrease of M-phase proliferating cells as labeled by anti-pH3 (green, compare A to B; average number of pH3+ cells  $\pm$  s.d.: controls: 184.25 $\pm$ 9.19; *Isl1*-nulls: 152.38 $\pm$  6.54, n=2, student t-test p<0.05.). C, D show the enlarged views of the boxed regions in A, B.

**Supplemental Table S1.** ISL1 and BRN3B regulate the expression of *Gap43* and *L1cam* in the retina. Real time PCR is performed with E14.5 retinas from *Isl1*-nulls, *Brn3b*-nulls and the controls. Relative expression of genes is calculated using the formula:  $2^{\Delta\text{MT} - \Delta\text{WT}}$ .  $\Delta\text{MT}$  is the difference of cutoff cycles between the gene of interest and the control gene ( $\beta$ -actin) for mutants and  $\Delta\text{WT}$  is that for controls. The numbers listed in the table are the average from three independent experiments.

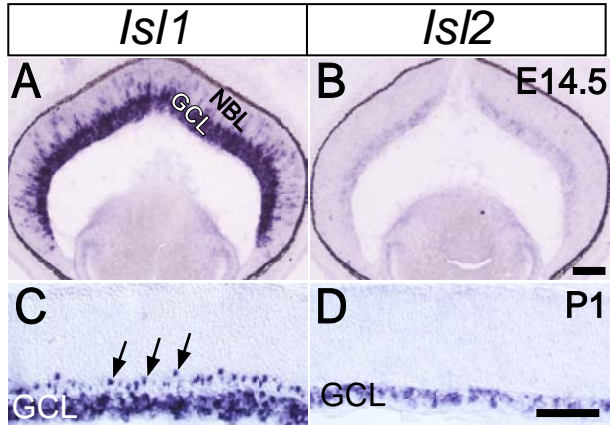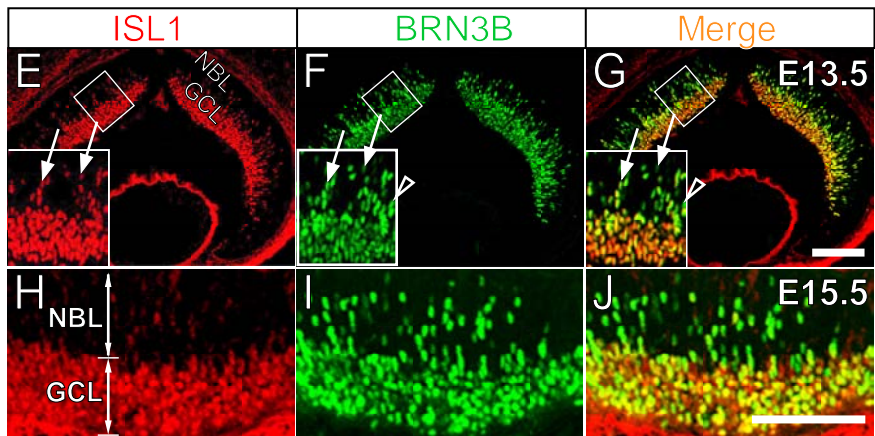

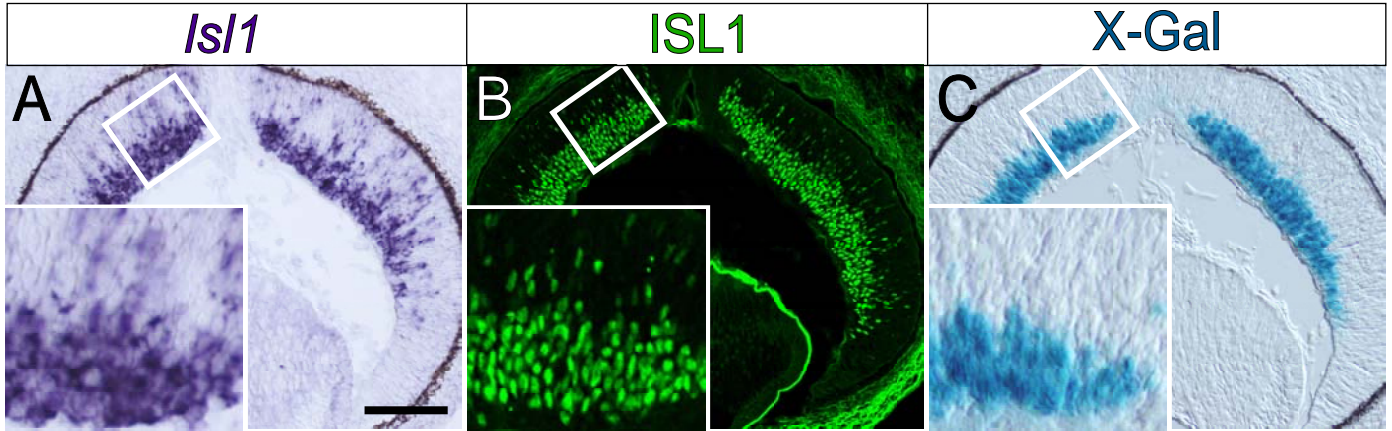

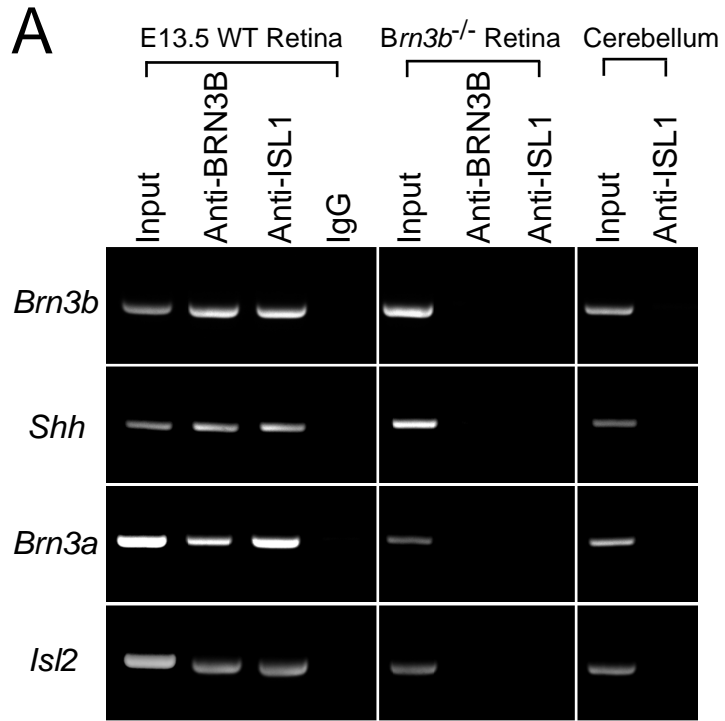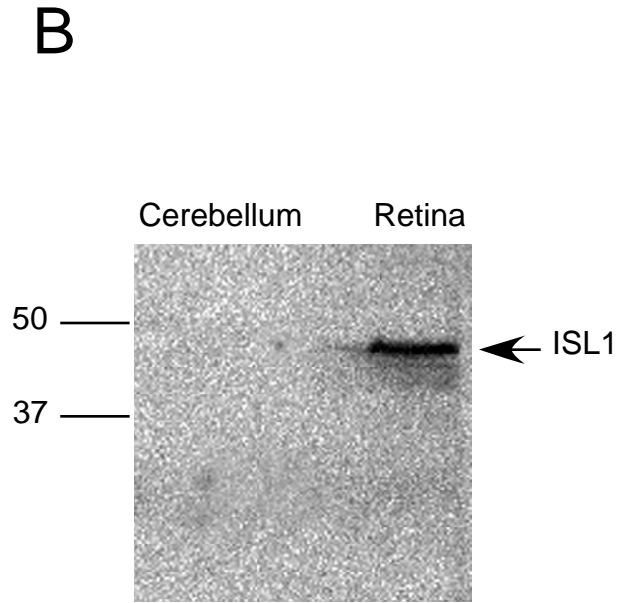

**A**

|                  | Forward primer             | Reverse primer             |
|------------------|----------------------------|----------------------------|
| <i>Brn3b</i>     | 5'-GGAAACCCCTGCTCTAATC     | 5'-GAAACGGTCCCCTTGTCTC     |
| <i>Brn3a</i>     | 5'-AGACGCGAAACCAACAAAGAG   | 5'-CTGTGAGGCAGTCAGTCCAAG   |
| <i>Isl2</i>      | 5'-TACTATCTGGCTTCATCTCCC   | 5'-TGGAGTAGAGTTCTCGGATGA   |
| <i>Shh</i>       | 5'-CACAGAGTCGGGCTTGATTAG   | 5'-AGGATGGATAGGGTTTTGGAG   |
| <i>Brn3b ORF</i> | 5'-GAGCAGCAGTTCCAGCAGCAGTG | 5'-GGTGGTGGTGGCTCTTACTCTGC |

**B**

Brn3a 5' upstream sequence (-5651 to -5500)

TTTAACAAATTAATTAATCCTAATGAATTAACTTCATTTATTTAAACGCGCTACAGTCCATG  
AATTAATTTTCATGCAGTGATTAAAGGCTGTTAAATATGCATGATTTTCGTTAAAATTTTATAA  
TAAATCAGGGCAATGTGTTAC

Shh 1<sup>st</sup> introns (+3761 ~ +3821)

CAGAGTCGGGCTTGATTAGCGGCACACGACCCAATGAATTAATAACCGGGCTGAGCTTCAA

Brn3b 5' upstream sequence (-3710 ~ -3580)

GCAAGACTGAAATGGGTTTTATTGATATGACCACGAGGATGTTGGTATTCTGAACACTCCTAA  
AGGGAGAGATTGCAAGACTCCAAGTCTTGCCGATGAAGGAAGAAGTGCATCTTTGCTCTAAT  
GCAACA

Isl2 5' upstream sequence (-6464 ~ -6129)

CGAGCATTAGCCAGCCTCCTGGCACTGGGCTTGCCATGCTCTAGGTGTGTGATGAGGCTAG  
TGGTGATAAATCTCTTCTGTCTGCAAGCAGCGAGGAGAGAGTGGCAGAGAGAGCTGCAACC  
AGGGAGCATTATGATTTTGTCTTAACTCCAAGGCATGTCTAAGGCACTATAAATAACACACA  
TTGTCTATAATTCAAAGTTGATCAAAACAGAAGTCAAGCCAGTGTGAGTGGAAATCTGCT  
GCCTCAAACCAATTACGAATTTCCAACAGATGAGCGAGCGAGCGAGCGAGCGCCTGACTG  
GAGTCCCTCCTGCAGTGGGCTAATGCC

**C**

|              |           |
|--------------|-----------|
| <i>Brn3a</i> | TTAATTAAT |
|              | TTAATTCAT |
|              | TTAATTCAT |
|              | ATAATAAAT |
| <i>Shh</i>   | TTAATTCAT |
| <i>Brn3b</i> | TTTATTGAT |
| <i>Isl2</i>  | ATAATTCAA |

Consensus: A T (<sup>A</sup>/T) A T T N A T

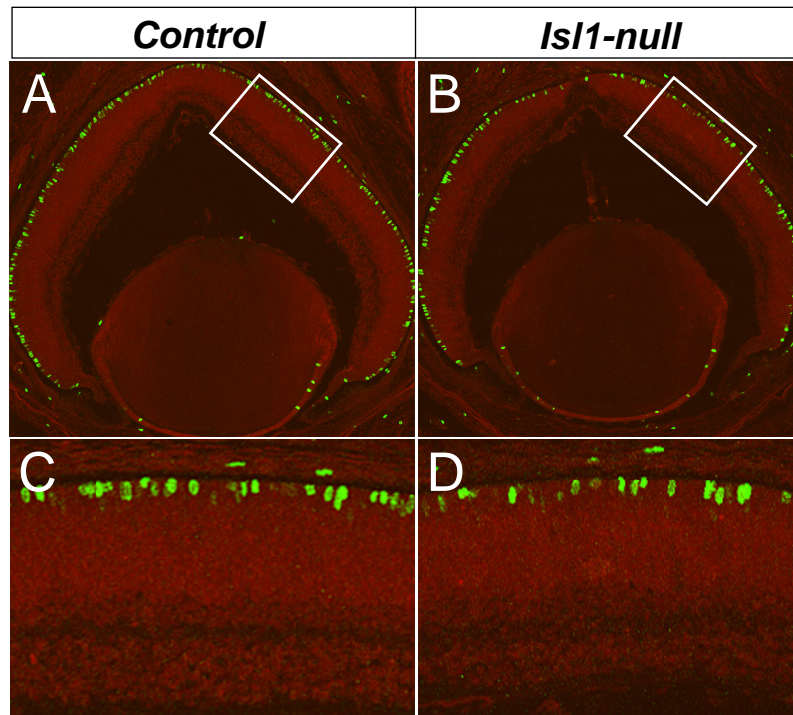

Table S1

|              | <i>Isl1</i> - null  |                    |         | <i>Brn3b</i> -null  |                    |         |
|--------------|---------------------|--------------------|---------|---------------------|--------------------|---------|
|              | Relative expression | Standard deviation | t-test  | Relative expression | Standard deviation | t-test  |
| <i>Gap43</i> | 0.578               | 0.029              | p<0.001 | 0.482               | 0.010              | p<0.001 |
| <i>L1cam</i> | 0.690               | 0.017              | p<0.01  | 0.727               | 0.082              | p<0.05  |
